# Supplementary material
Source: Springer Nature journal article supplement (https://www.springermedizin.de/resource/supplementary/12936_2011_1979_MOESM2_ESM.pdf/9542634)

**ITN Possession and Distance to Nearest Health Facility**

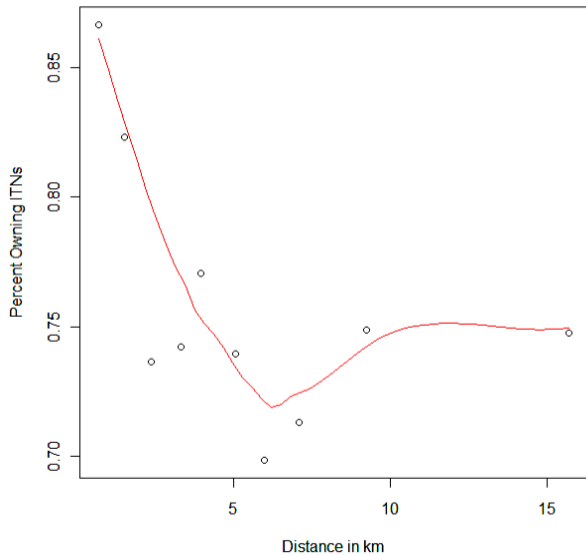

**ITN Use and Distance to Nearest Health Facility**

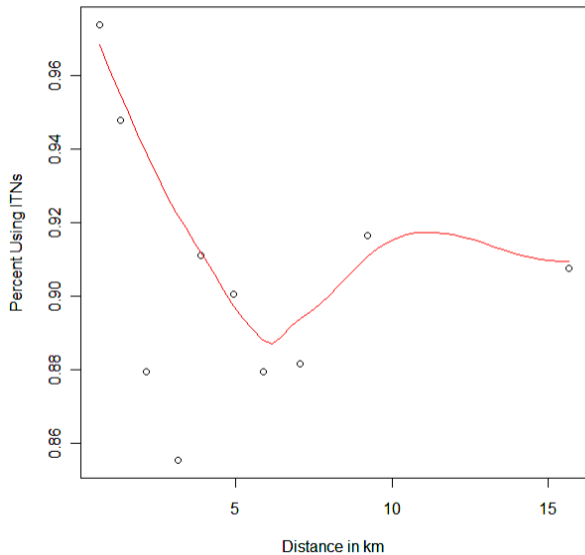

Supplement: MOESM2 [file 9542634]
